# Supplementary material for: Computationally Driven, Quantitative Experiments Discover Genes Required for Mitochondrial Biogenesis
Source: PLoS Genet. 2009 Mar 20;5(3):e1000407. doi: 10.1371/journal.pgen.1000407 (PMC2648979; doi:10.1371/journal.pgen.1000407)
Supplement: Table S3 — Gold Standards used for 1st and 2nd iteration computational predictions. (0.04 MB XLS) [file pgen.1000407.s006.xls]

## Sheet: Table_S3.txt
Description of Table S3. Gold Standards used for 1st and 2nd iteration computational predictions.
Known mitochondrial genes used by the computational prediction algorithms to generate candidate lists of experimental testing. For example the 1st iteration Gold Standard used the 106 genes annotated to the GO process: 0007005: mitochondrion organization and biogenesis as of April 15th, 2007.
ORF	When used in gold standard
YAL010C	1st and 2nd
YBL080C	1st and 2nd
YBR091C	1st and 2nd
YBR179C	1st and 2nd
YBR185C	1st and 2nd
YBR192W	1st and 2nd
YBR212W	1st and 2nd
YBR234C	1st and 2nd
YCL044C	1st and 2nd
YCR020C	1st and 2nd
YCR028C-A	1st and 2nd
YDL006W	1st and 2nd
YDL029W	1st and 2nd
YDL142C	1st and 2nd
YDL198C	1st and 2nd
YDL217C	1st and 2nd
YDR077W	1st and 2nd
YDR150W	1st and 2nd
YDR219C	1st and 2nd
YDR258C	1st and 2nd
YDR296W	1st and 2nd
YDR339C	1st and 2nd
YDR393W	1st and 2nd
YDR470C	1st and 2nd
YEL020W-A	1st and 2nd
YER154W	1st and 2nd
YFL036W	1st and 2nd
YFL039C	1st and 2nd
YGL020C	1st and 2nd
YGL055W	1st and 2nd
YGL219C	1st and 2nd
YGR101W	1st and 2nd
YGR144W	1st and 2nd
YGR181W	1st and 2nd
YHR005C-A	1st and 2nd
YHR031C	1st and 2nd
YHR083W	1st and 2nd
YHR120W	1st and 2nd
YHR194W	1st and 2nd
YIL051C	1st and 2nd
YIL062C	1st and 2nd
YIL065C	1st and 2nd
YIL138C	1st and 2nd
YJL054W	1st and 2nd
YJL063C	1st and 2nd
YJL112W	1st and 2nd
YJL116C	1st and 2nd
YJR065C	1st and 2nd
YJR118C	1st and 2nd
YJR120W	1st and 2nd
YJR135W-A	1st and 2nd
YJR144W	1st and 2nd
YKL013C	1st and 2nd
YKL053C-A	1st and 2nd
YKR036C	1st and 2nd
YKR042W	1st and 2nd
YKR085C	1st and 2nd
YLL001W	1st and 2nd
YLL006W	1st and 2nd
YLL013C	1st and 2nd
YLR190W	1st and 2nd
YLR304C	1st and 2nd
YLR355C	1st and 2nd
YLR368W	1st and 2nd
YLR370C	1st and 2nd
YML058W	1st and 2nd
YML061C	1st and 2nd
YML091C	1st and 2nd
YML104C	1st and 2nd
YMR012W	1st and 2nd
YMR060C	1st and 2nd
YMR072W	1st and 2nd
YMR134W	1st and 2nd
YMR211W	1st and 2nd
YMR241W	1st and 2nd
YMR275C	1st and 2nd
YMR302C	1st and 2nd
YNL026W	1st and 2nd
YNL055C	1st and 2nd
YNL066W	1st and 2nd
YNL070W	1st and 2nd
YNL079C	1st and 2nd
YNL121C	1st and 2nd
YNL149C	1st and 2nd
YNL213C	1st and 2nd
YNL304W	1st and 2nd
YNL310C	1st and 2nd
YNR035C	1st and 2nd
YOL009C	1st and 2nd
YOL027C	1st and 2nd
YOL060C	1st and 2nd
YOL076W	1st and 2nd
YOL095C	1st and 2nd
YOR037W	1st and 2nd
YOR060C	1st and 2nd
YOR147W	1st and 2nd
YOR211C	1st and 2nd
YOR266W	1st and 2nd
YOR326W	1st and 2nd
YOR330C	1st and 2nd
YPL098C	1st and 2nd
YPR024W	1st and 2nd
YPR083W	1st and 2nd
YPR125W	1st and 2nd
YPR131C	1st and 2nd
YPR140W	1st and 2nd
Q0080	2nd
Q0085	2nd
Q0130	2nd
YAL005C	2nd
YAL039C	2nd
YAL046C	2nd
YAL048C	2nd
YBL007C	2nd
YBL022C	2nd
YBL030C	2nd
YBL067C	2nd
YBL099W	2nd
YBR003W	2nd
YBR022W	2nd
YBR037C	2nd
YBR039W	2nd
YBR104W	2nd
YBR108W	2nd
YBR111C	2nd
YBR151W	2nd
YBR163W	2nd
YBR171W	2nd
YBR177C	2nd
YBR194W	2nd
YBR227C	2nd
YBR230C	2nd
YBR262C	2nd
YBR291C	2nd
YCL057W	2nd
YDL004W	2nd
YDL104C	2nd
YDL107W	2nd
YDL130W-A	2nd
YDL178W	2nd
YDL181W	2nd
YDR036C	2nd
YDR079W	2nd
YDR129C	2nd
YDR148C	2nd
YDR194C	2nd
YDR231C	2nd
YDR298C	2nd
YDR316W	2nd
YDR322C-A	2nd
YDR375C	2nd
YDR377W	2nd
YDR388W	2nd
YDR430C	2nd
YDR493W	2nd
YDR529C	2nd
YEL030W	2nd
YEL039C	2nd
YEL050C	2nd
YER017C	2nd
YER058W	2nd
YER080W	2nd
YER087W	2nd
YFR011C	2nd
YGL107C	2nd
YGL160W	2nd
YGL220W	2nd
YGL221C	2nd
YGR008C	2nd
YGR028W	2nd
YGR029W	2nd
YGR033C	2nd
YGR046W	2nd
YGR062C	2nd
YGR080W	2nd
YGR082W	2nd
YGR132C	2nd
YGR150C	2nd
YGR174C	2nd
YGR231C	2nd
YHR024C	2nd
YHR038W	2nd
YHR059W	2nd
YHR116W	2nd
YHR117W	2nd
YHR198C	2nd
YIL006W	2nd
YIL022W	2nd
YIL034C	2nd
YIL070C	2nd
YIL095W	2nd
YIL098C	2nd
YIL114C	2nd
YIL136W	2nd
YIL155C	2nd
YIL157C	2nd
YIL158W	2nd
YIR003W	2nd
YJL003W	2nd
YJL046W	2nd
YJL104W	2nd
YJL131C	2nd
YJL133W	2nd
YJL143W	2nd
YJL180C	2nd
YJR032W	2nd
YJR034W	2nd
YJR045C	2nd
YJR048W	2nd
YJR080C	2nd
YJR100C	2nd
YJR121W	2nd
YJR122W	2nd
YJR133W	2nd
YKL016C	2nd
YKL037W	2nd
YKL084W	2nd
YKL087C	2nd
YKL129C	2nd
YKL134C	2nd
YKL148C	2nd
YKL150W	2nd
YKL167C	2nd
YKL194C	2nd
YKL195W	2nd
YKL207W	2nd
YKL208W	2nd
YKR016W	2nd
YKR052C	2nd
YKR065C	2nd
YKR074W	2nd
YLL009C	2nd
YLL018C-A	2nd
YLL027W	2nd
YLR008C	2nd
YLR038C	2nd
YLR059C	2nd
YLR163C	2nd
YLR168C	2nd
YLR193C	2nd
YLR203C	2nd
YLR204W	2nd
YLR239C	2nd
YLR259C	2nd
YLR268W	2nd
YLR289W	2nd
YLR295C	2nd
YLR330W	2nd
YLR337C	2nd
YLR348C	2nd
YLR418C	2nd
YML030W	2nd
YML032C	2nd
YML050W	2nd
YML054C	2nd
YML081C-A	2nd
YML086C	2nd
YML112W	2nd
YML120C	2nd
YML129C	2nd
YMR003W	2nd
YMR035W	2nd
YMR056C	2nd
YMR067C	2nd
YMR089C	2nd
YMR098C	2nd
YMR110C	2nd
YMR150C	2nd
YMR157C	2nd
YMR203W	2nd
YMR228W	2nd
YMR267W	2nd
YMR282C	2nd
YNL020C	2nd
YNL064C	2nd
YNL100W	2nd
YNL131W	2nd
YNL138W	2nd
YNL153C	2nd
YNL252C	2nd
YNL315C	2nd
YNL328C	2nd
YNR001C	2nd
YNR017W	2nd
YNR018W	2nd
YOL026C	2nd
YOL042W	2nd
YOL053W	2nd
YOL077W-A	2nd
YOR045W	2nd
YOR130C	2nd
YOR142W	2nd
YOR187W	2nd
YOR215C	2nd
YOR222W	2nd
YOR232W	2nd
YOR286W	2nd
YOR297C	2nd
YOR317W	2nd
YOR334W	2nd
YPL050C	2nd
YPL059W	2nd
YPL060W	2nd
YPL063W	2nd
YPL072W	2nd
YPL078C	2nd
YPL099C	2nd
YPL118W	2nd
YPL132W	2nd
YPL134C	2nd
YPL158C	2nd
YPL159C	2nd
YPL172C	2nd
YPL215W	2nd
YPL240C	2nd
YPL262W	2nd
YPL271W	2nd
YPR004C	2nd
YPR020W	2nd
YPR058W	2nd
YPR067W	2nd
YPR133W-A	2nd
YPR155C	2nd
YPR183W	2nd
